# Supplementary material
Source: PubMed Central journal article supplement (PMC2417187)

**Supplemental Information.** Network of genes with altered expression in tibialis anterior muscle in H6PD mutant mice. The analysis is the similar to Figure 6 in the print version, but the network has been extended to comprise 65 genes, and elements have been rearranged to make individual connections clearer. Solid lines represent proteins that are known to physically interact whereas broken lines denote indirect relationships. Red and green objects denote genes that are overexpressed or underexpressed, respectively, in H6PD mutant mice relative to wild type controls, at false discovery rates (FDR) <0.05. Gene names are indicated. Numbers below each gene denote degree of overexpression or underexpression. Several objects labeled with names and no numbers denote groups of genes (e.g., myosin).

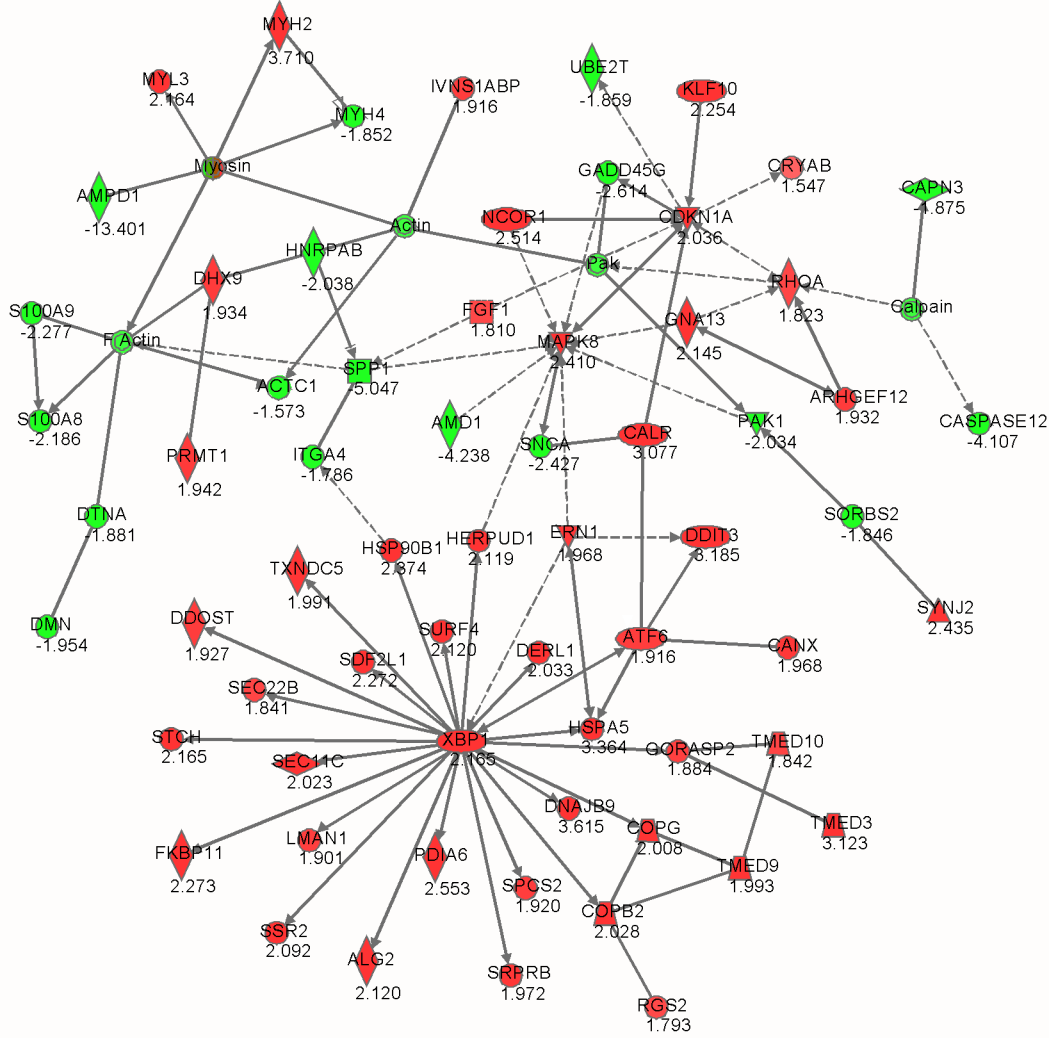

Supplement: jbc_M710067200_1.pdf [file jbc_M710067200_1.pdf]
